# Supplementary material
Source: MDPI journal article supplement (https://www.mdpi.com/2079-3197/4/3/23)
Supplement: s1 [file s1]

# Supplementary Materials: Orbital Energy-Based Reaction Analysis of S<sub>N</sub>2 Reactions

Takao Tsuneda, Satoshi Maeda, Yu Harabuchi and Raman K. Singh

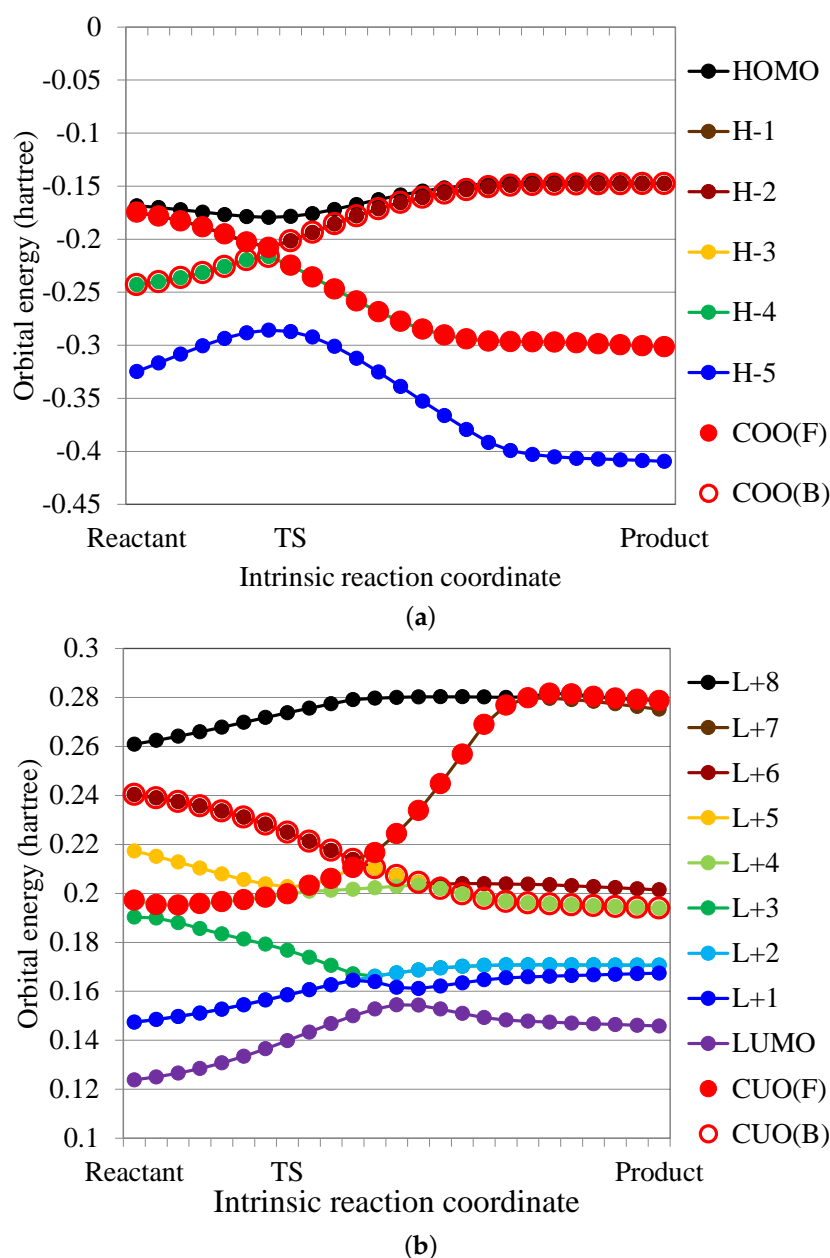

**Figure S1.** (a) Calculated occupied orbital energies and contributing occupied orbital energies on the intrinsic reaction coordinate of the  $\text{Cl}^- + \text{CH}_3\text{I} \rightarrow \text{CH}_3\text{Cl} + \text{I}^-$  reaction by LC-BOP/Def2-TZVPD calculations. “COO(F)” and “COO(R)” indicate the contributing occupied orbital energies for the forward and reverse processes; (b) Calculated unoccupied orbital energies and contributing unoccupied orbital energies on the intrinsic reaction coordinate of the  $\text{Cl}^- + \text{CH}_3\text{I} \rightarrow \text{CH}_3\text{Cl} + \text{I}^-$  reaction by LC-BOP/Def2-TZVPD calculations. “CUO(F)” and “CUO(R)” indicate the contributing unoccupied orbital energies for the forward and reverse processes.

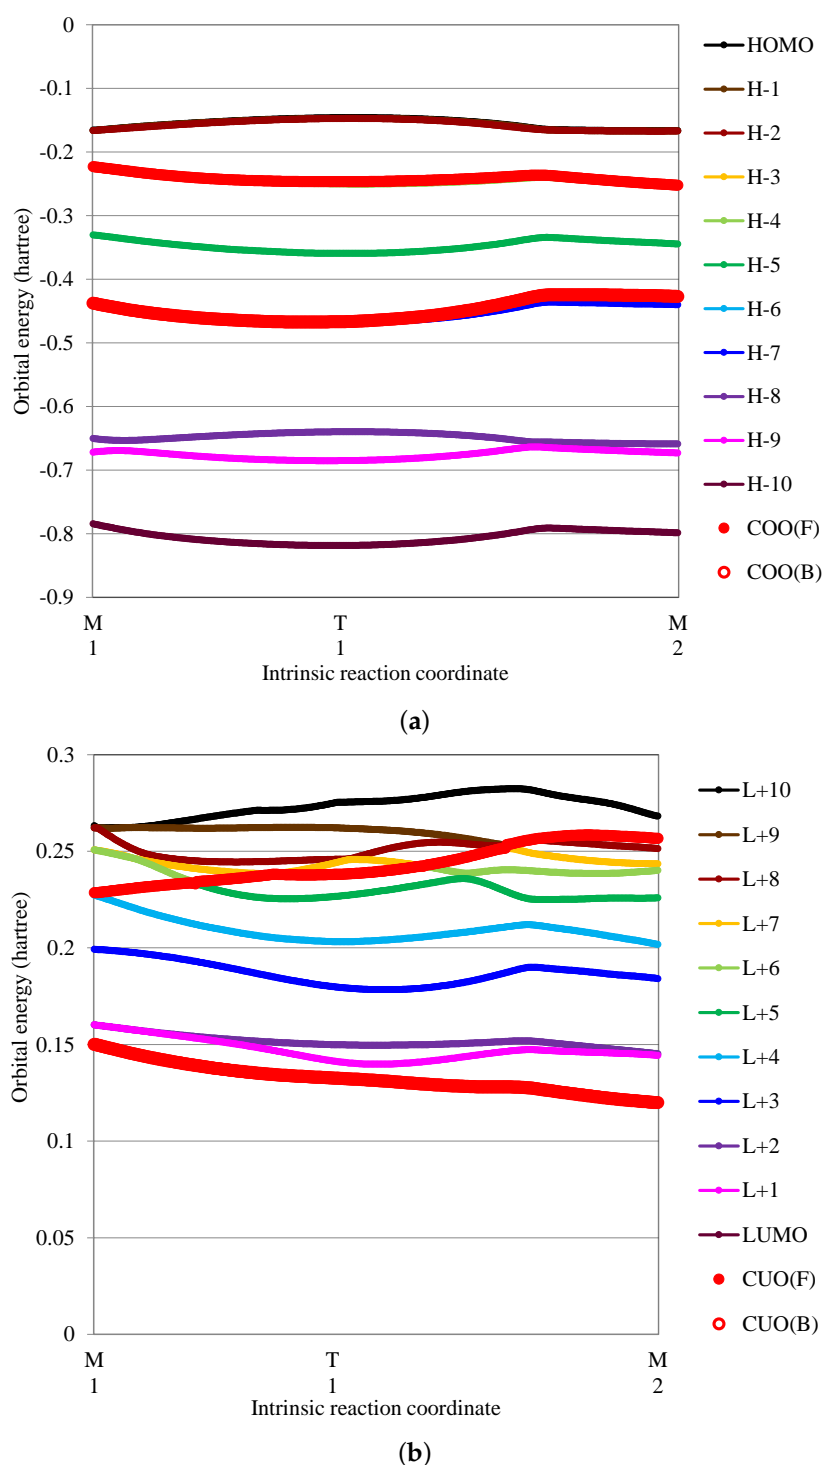

**Figure S2.** (a) Calculated occupied orbital energies and contributing occupied orbital energies on the intrinsic reaction coordinate of the first step (Min1 to Min2 of Figure 3) of the  $\text{Cl}^- + \text{CH}_3\text{I} \rightarrow \text{CH}_3\text{Cl} + \text{I}^-$  reaction, which was determined by the artificial force induced reaction method in the GRRM program, by LC-BOP+LRD/Def2-TZVPD calculations. “COO(F)” and “COO(R)” indicate the contributing occupied orbital energies for the forward and reverse processes; (b) Calculated unoccupied orbital energies and contributing unoccupied orbital energies on the intrinsic reaction coordinate of the first step (Min1 to Min2 of Figure 3) of the  $\text{Cl}^- + \text{CH}_3\text{I} \rightarrow \text{CH}_3\text{Cl} + \text{I}^-$  reaction, which was determined by the artificial force induced reaction method in the GRRM program, by LC-BOP+LRD/Def2-TZVPD calculations. “CUO(F)” and “CUO(R)” indicate the contributing unoccupied orbital energies for the forward and reverse processes.

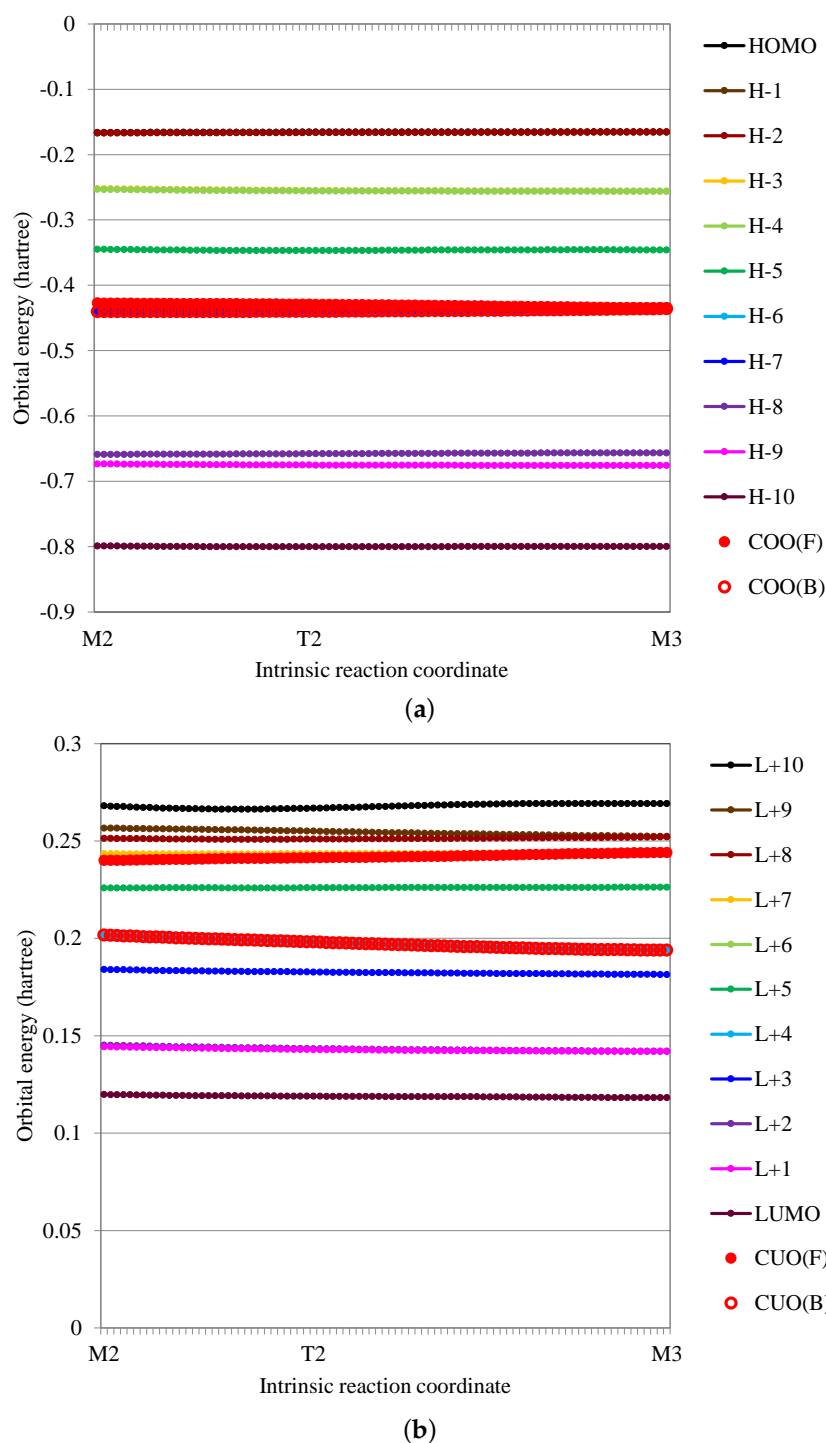

**Figure S3.** (a) Calculated occupied orbital energies and contributing occupied orbital energies on the intrinsic reaction coordinate of the second step (Min2 to Min3 of Figure 3) of the  $\text{Cl}^- + \text{CH}_3\text{I} \rightarrow \text{CH}_3\text{Cl} + \text{I}^-$  reaction, which was determined by the artificial force induced reaction method in the GRRM program, by LC-BOP+LRD/Def2-TZVPD calculations. “COO(F)” and “COO(R)” indicate the contributing occupied orbital energies for the forward and reverse processes; (b) Calculated unoccupied orbital energies and contributing unoccupied orbital energies on the intrinsic reaction coordinate of the second step (Min2 to Min3 of Figure 3) of the  $\text{Cl}^- + \text{CH}_3\text{I} \rightarrow \text{CH}_3\text{Cl} + \text{I}^-$  reaction, which was determined by the artificial force induced reaction method in the GRRM program, by LC-BOP+LRD/Def2-TZVPD calculations. “CUO(F)” and “CUO(R)” indicate the contributing unoccupied orbital energies for the forward and reverse processes.

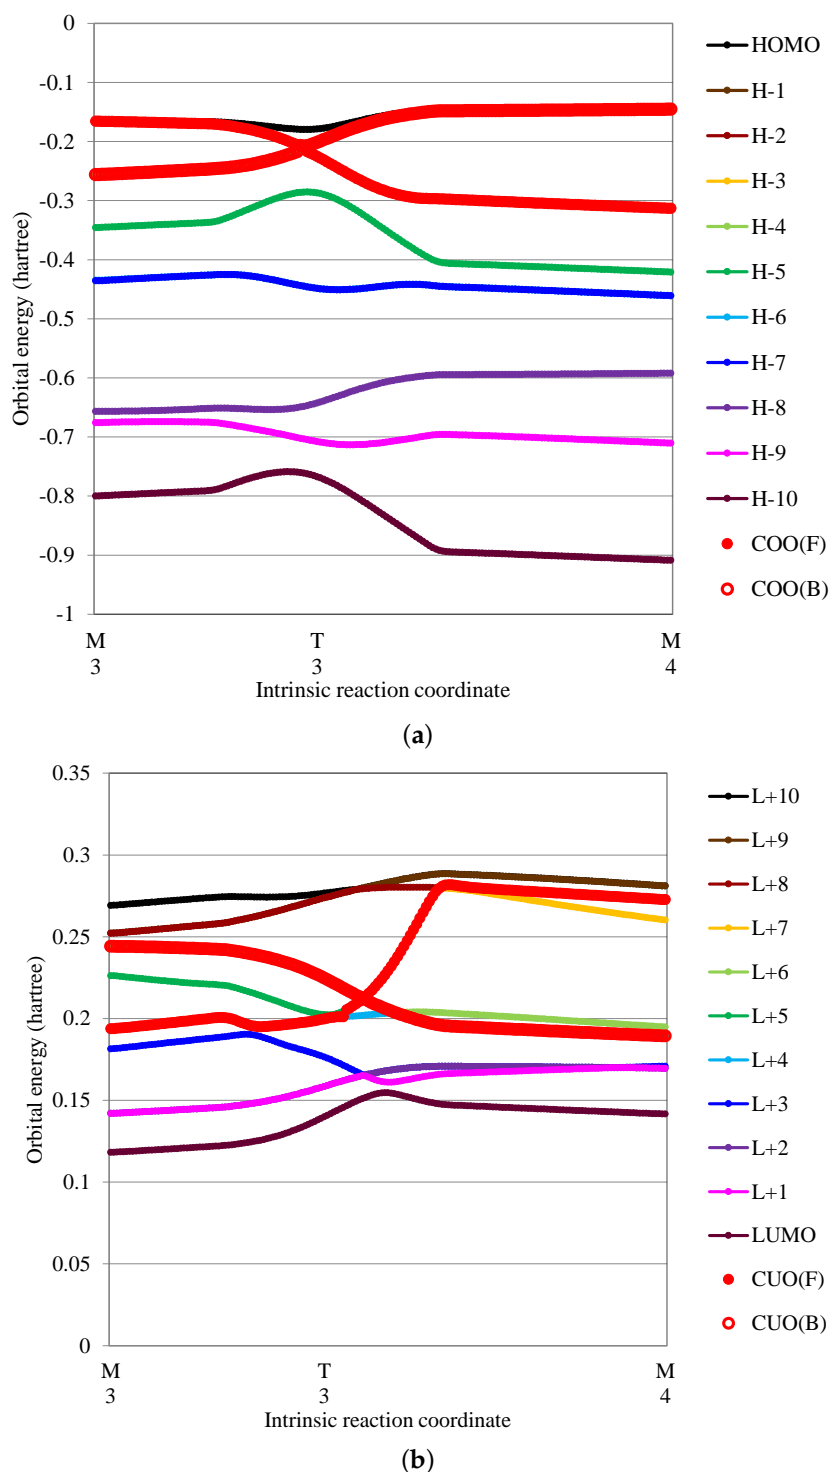

**Figure S4.** (a) Calculated occupied orbital energies and contributing occupied orbital energies on the intrinsic reaction coordinate of the third step (Min3 to Min4 of Figure 3) of the  $\text{Cl}^- + \text{CH}_3\text{I} \rightarrow \text{CH}_3\text{Cl} + \text{I}^-$  reaction, which was determined by the artificial force induced reaction method in the GRRM program, by LC-BOP+LRD/Def2-TZVPD calculations. “COO(F)” and “COO(R)” indicate the contributing occupied orbital energies for the forward and reverse processes; (b) Calculated unoccupied orbital energies and contributing unoccupied orbital energies on the intrinsic reaction coordinate of the third step (Min3 to Min4 of Figure 3) of the  $\text{Cl}^- + \text{CH}_3\text{I} \rightarrow \text{CH}_3\text{Cl} + \text{I}^-$  reaction, which was determined by the artificial force induced reaction method in the GRRM program, by LC-BOP+LRD/Def2-TZVPD calculations. “CUO(F)” and “CUO(R)” indicate the contributing unoccupied orbital energies for the forward and reverse processes.

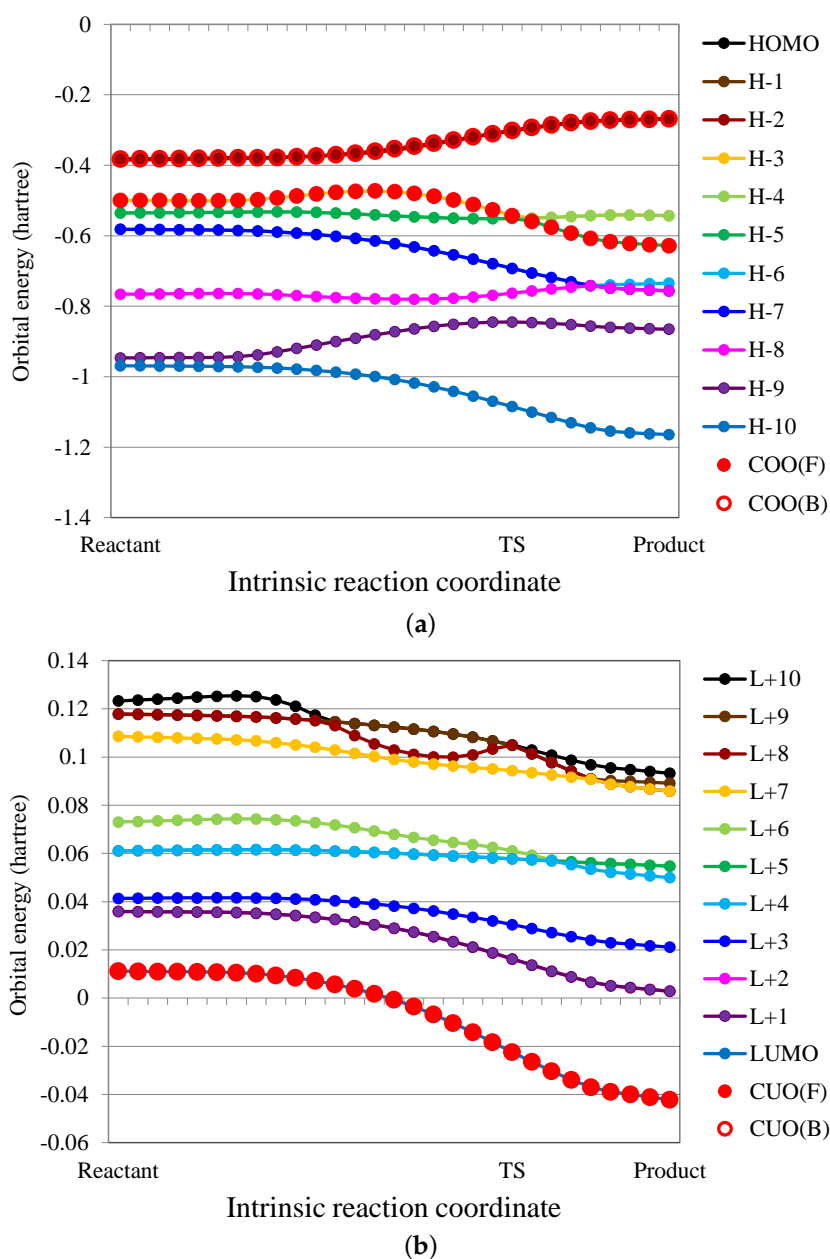

**Figure S5.** (a) Calculated occupied orbital energies and contributing occupied orbital energies on the intrinsic reaction coordinate of the  $\text{NH}_3 + \text{CH}_3\text{Cl} \rightarrow \text{NH}_3\text{CH}_3^+ + \text{Cl}^-$  reaction in gas phase by LC-BOP/aug-cc-pVTZ calculations. “COO(F)” and “COO(R)” indicate the contributing occupied orbital energies for the forward and reverse processes; (b) Calculated unoccupied orbital energies and contributing unoccupied orbital energies on the intrinsic reaction coordinate of the  $\text{NH}_3 + \text{CH}_3\text{Cl} \rightarrow \text{NH}_3\text{CH}_3^+ + \text{Cl}^-$  reaction in gas phase by LC-BOP/aug-cc-pVTZ calculations. “CUO(F)” and “CUO(R)” indicate the contributing unoccupied orbital energies for the forward and reverse processes.

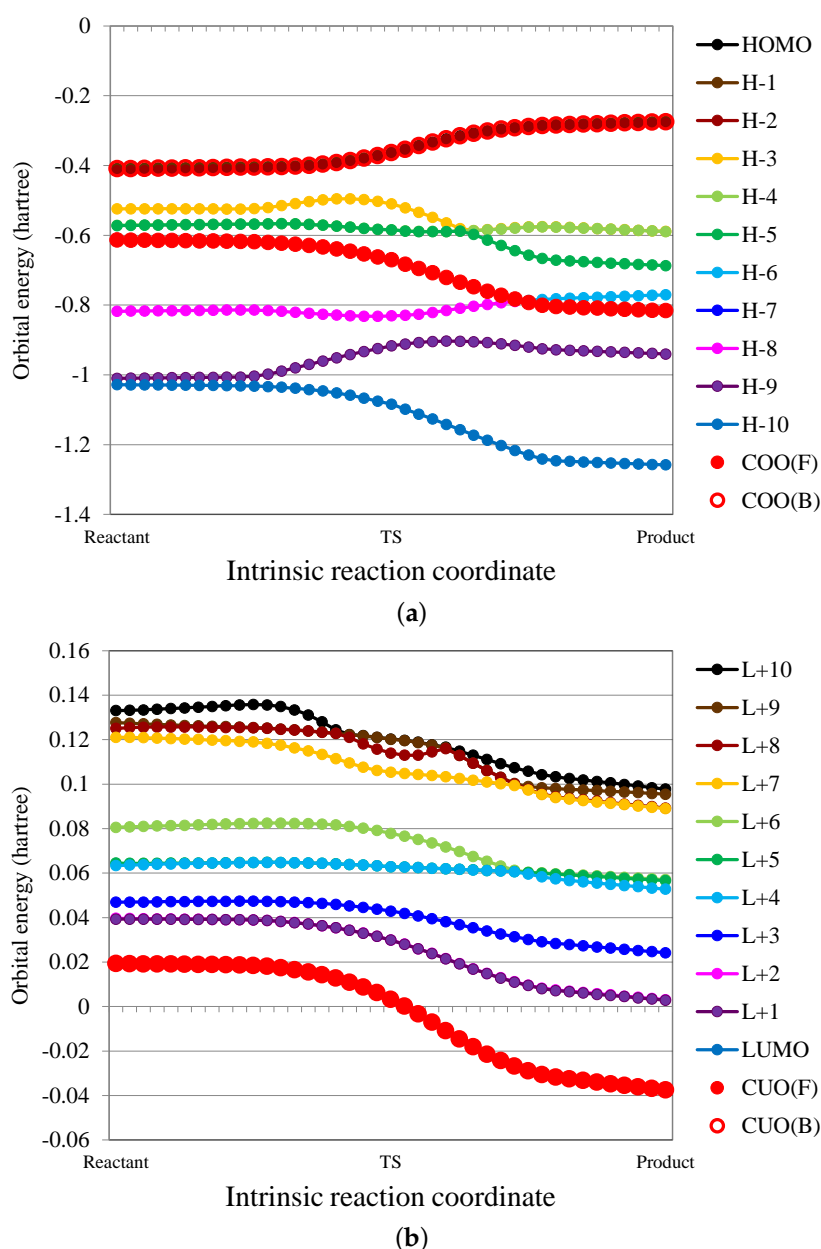

**Figure S6.** (a) Calculated occupied orbital energies and contributing occupied orbital energies on the intrinsic reaction coordinate of the  $\text{NH}_3 + \text{CH}_3\text{Cl} \rightarrow \text{NH}_3\text{CH}_3^+ + \text{Cl}^-$  reaction in aqueous solution by LC-BOP/aug-cc-pVTZ calculations. “COO(F)” and “COO(R)” indicate the contributing occupied orbital energies for the forward and reverse processes. The CPCM-SCRF method is used to evaluate the solvent effects; (b) Calculated unoccupied orbital energies and contributing occupied orbital energies on the intrinsic reaction coordinate of the  $\text{NH}_3 + \text{CH}_3\text{Cl} \rightarrow \text{NH}_3\text{CH}_3^+ + \text{Cl}^-$  reaction in aqueous solution by LC-BOP/aug-cc-pVTZ calculations. “CUO(F)” and “CUO(R)” indicate the contributing unoccupied orbital energies for the forward and reverse processes. The CPCM-SCRF method is used to evaluate the solvent effects.

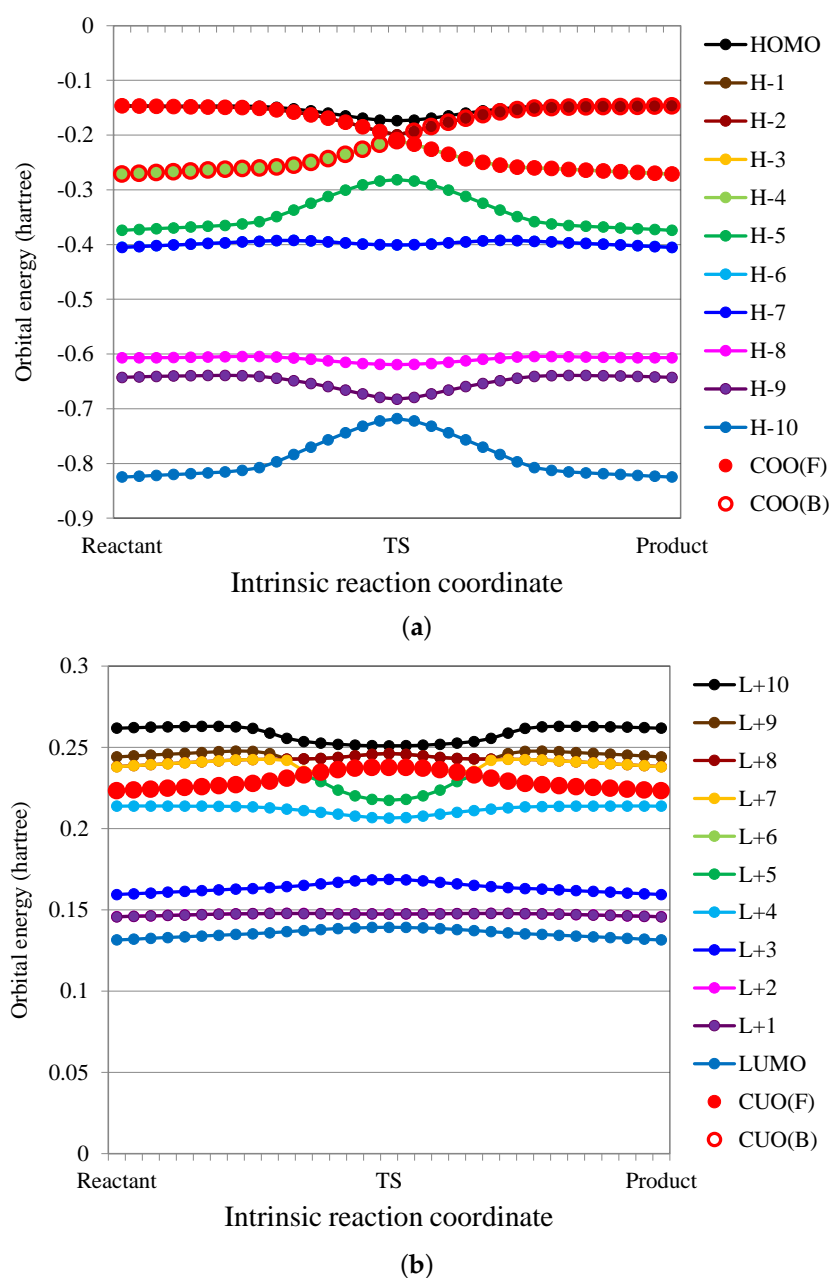

**Figure S7.** (a) Calculated occupied orbital energies and contributing occupied orbital energies on the intrinsic reaction coordinate of the  $\text{Cl}^- \cdots \text{CH}_3\text{Cl} \rightarrow \text{ClCH}_3 \cdots \text{Cl}^-$  reaction in gas phase by LC-BOP/aug-cc-pVTZ calculations. “COO(F)” and “COO(R)” indicate the contributing occupied orbital energies for the forward and reverse processes; (b) Calculated unoccupied orbital energies and contributing unoccupied orbital energies on the intrinsic reaction coordinate of the  $\text{Cl}^- \cdots \text{CH}_3\text{Cl} \rightarrow \text{ClCH}_3 \cdots \text{Cl}^-$  reaction in gas phase by LC-BOP/aug-cc-pVTZ calculations. “CUO(F)” and “CUO(R)” indicate the contributing unoccupied orbital energies for the forward and reverse processes.

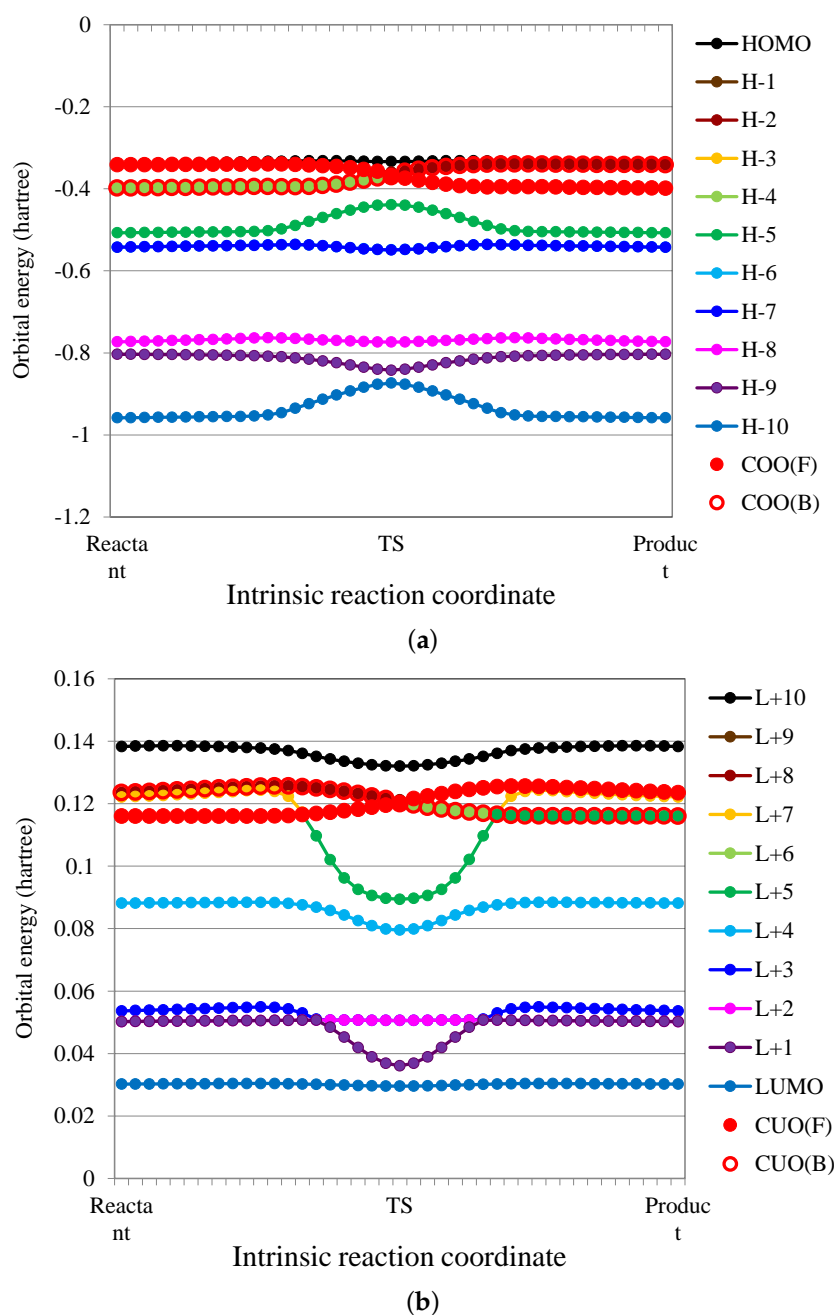

**Figure S8.** (a) Calculated occupied orbital energies and contributing occupied orbital energies on the intrinsic reaction coordinate of the  $\text{Cl}^- \cdots \text{CH}_3\text{Cl} \rightarrow \text{ClCH}_3 \cdots \text{Cl}^-$  reaction in aqueous solution by LC-BOP/aug-cc-pVTZ calculations. “COO(F)” and “COO(R)” indicate the contributing occupied orbital energies for the forward and reverse processes. The CPCM-SCRF method is used to evaluate the solvent effects; (b) Calculated unoccupied orbital energies and contributing unoccupied orbital energies on the intrinsic reaction coordinate of the  $\text{Cl}^- \cdots \text{CH}_3\text{Cl} \rightarrow \text{ClCH}_3 \cdots \text{Cl}^-$  reaction in aqueous solution by LC-BOP/aug-cc-pVTZ calculations. “CUO(F)” and “CUO(R)” indicate the contributing unoccupied orbital energies for the forward and reverse processes. The CPCM-SCRF method is used to evaluate the solvent effects.
